# Supplementary material
Source: PubMed Central journal article supplement (PMC9743242)
Supplement: EIJ-E-22-00036_Andreini_SD.pdf [file EIJ-E-22-00036_Andreini_SD.pdf]

**Appendix 1. Author relationships with industry—pre-procedural planning of coronary revascularization by cardiac-CT**

| Writing group member     | Employment                                                                                                                                | Consultant                                             | Speakers Bureau | Stock and stock options | Grants and research support                                  | Royalties |
|--------------------------|-------------------------------------------------------------------------------------------------------------------------------------------|--------------------------------------------------------|-----------------|-------------------------|--------------------------------------------------------------|-----------|
| Daniele Andreini (chair) | Centro Cardiologico Monzino, IRCCS                                                                                                        | None                                                   | None            | None                    | None                                                         | None      |
| Antonio Bartorelli       | Univerity of Milan/Centro Cardiologico Monzino                                                                                            | None                                                   | None            | None                    | None                                                         | None      |
| Marcio Bittencourt       | Faculdade Israelita de Ciencias da Saude Albert Einstein                                                                                  | Bayer                                                  | Novo Nordisk    | None                    | None                                                         | None      |
| Nico Buls                | Medical Physics Expert (MPE)                                                                                                              | None                                                   | None            | None                    | None                                                         | None      |
| Carlos Collet            | OLV Aalst                                                                                                                                 | Abbott Vascular, HeartFlow, Siemens                    | None            | None                    | Abbott Vascular, HeartFlow, Siemens                          | None      |
| Edoardo Conte            | Centro Cardiologico Monzino, IRCCS                                                                                                        | None                                                   | None            | None                    | None                                                         | None      |
| Johan De Mey             | UZBrussel                                                                                                                                 | None                                                   | None            | None                    | None                                                         | None      |
| Brian B. Ghoshhajra      | Massachusetts General Hospital                                                                                                            | Siemens Healthineers                                   | None            | None                    | None                                                         | None      |
| Paul Knappen             | AUMC                                                                                                                                      | None                                                   | None            | None                    | None                                                         | None      |
| Jonathon Leipsic         | University of British Columbia                                                                                                            | Circle CVI, HeartFlow, MVRX                            | Philips         | HeartFlow, Circle CVI   | Abbott, Boston Scientific, Edwards, GE Healthcare, Medtronic | None      |
| Saima Mushtaq            | Centro Cardiologico Monzino, IRCCS                                                                                                        | None                                                   | None            | None                    | None                                                         | None      |
| Koen Nieman              | Stanford Univeristy                                                                                                                       | Siemens Medical Solutions USA                          | None            | Lumen Therapeutics      | Bayer, HeartFlow, Siemens Healthineer                        | None      |
| Yoshinobu Onuma          | National University of Ireland, Galway                                                                                                    | None                                                   | None            | None                    | None                                                         | None      |
| Patrick Serruys          | National University of Ireland, Galway                                                                                                    | Merillife, Novartis, Philips, SinoMedical, SMT, Xeltis | None            | None                    | None                                                         | None      |
| Jeroen Sonck             | Cardiovascular Center Aalst, OLV Clinic, (Belgium); Department of Advanced Biomedical Sciences, University of Naples, Federico II (Italy) | None                                                   | None            | None                    | CardioPath PhD program                                       | None      |
| Giulio Stefanini         | Humanitas University                                                                                                                      | Abbott Vascular                                        | None            | None                    | Boston Scientific                                            | None      |

**Appendix 2. Reviewer relationships with industry—pre-procedural planning of coronary revascularization by cardiac-CT**

| Reviewer               | Employment                               | Consultant/Honoraria | Speakers Bureau | Stock and stock options | Grants and research support | Royalties |
|------------------------|------------------------------------------|----------------------|-----------------|-------------------------|-----------------------------|-----------|
| Jose Simao Henriques   | Amsterdam Univeristy Medical Centers     | None                 | None            | None                    | None                        | None      |
| Abdul Ihdahid          | Monash University, Australia             | None                 | None            | None                    | None                        | None      |
| Gianluca Pontone       | Centro Cardiologico Monzino IRCCS, Italy | None                 | None            | None                    | None                        | None      |
| Nicolas M. Van Mieghem | Erasmus University Medical Center        | None                 | None            | None                    | None                        | None      |
| Stephan Achenbach      | University of Erlangen                   | None                 | None            | None                    | None                        | None      |
